# Supplementary material
Source: PubMed Central journal article supplement (PMC6790280)
Supplement: NIHMS1535016-supplement-1.pdf [file NIHMS1535016-supplement-1.pdf]

## Supplementary Tables and Figures

**Supplementary Figure 1.** Distribution of age at nephrectomy by histological subtype. The lower end of the box shows the 25<sup>th</sup> percentile and the upper end of box shows the 75<sup>th</sup> percentile. The diamond inside the box is the mean and the line inside the box is the median. The 'whisker' coming out of the box shows, unless there are outliers, show the min (lower whisker) and max (upper whisker). If there are outliers open circles denote these and the whisker is cut off at 1.5 times the IQR. IQR is interquartile range which is the 75<sup>th</sup> percentile – the 25<sup>th</sup> percentile (top of box – bottom of box). The bigger the box the more variability

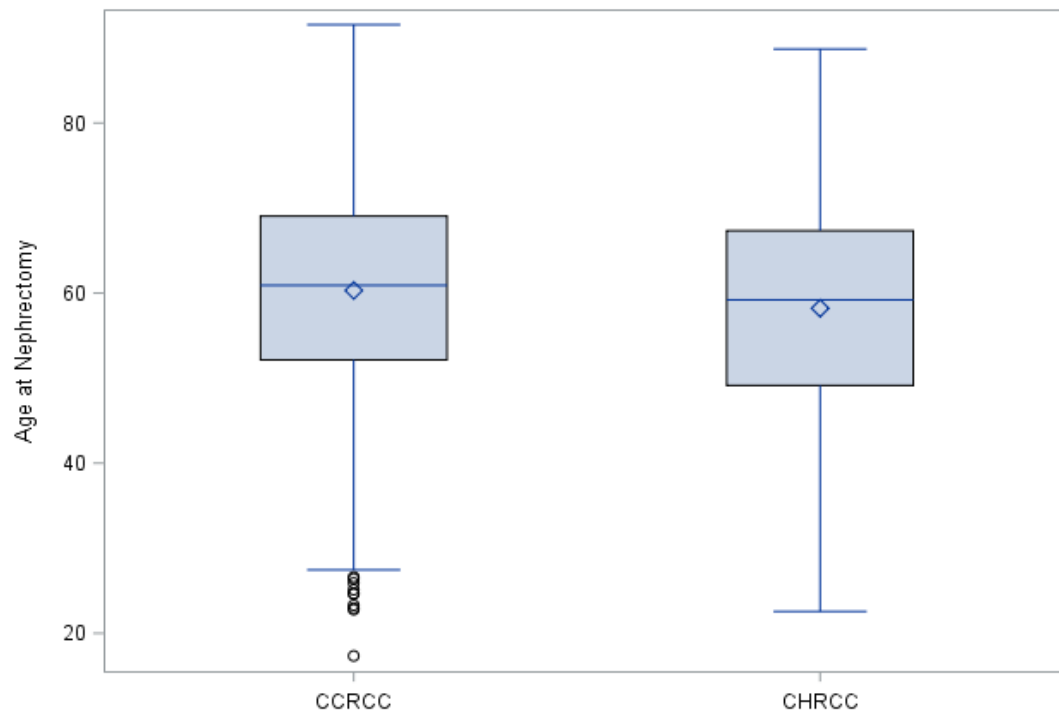

**Supplementary Table 1.** Surgery procedures performed in the cohorts.

|                                  | <b>Total</b><br><b>(n=3808)</b> | <b>ccRCC</b><br><b>(n=3312)</b> | <b>chRCC</b><br><b>(n=496)</b> | <b>p-value</b>   |
|----------------------------------|---------------------------------|---------------------------------|--------------------------------|------------------|
| Procedure (%)                    |                                 |                                 |                                | <b>&lt;.0001</b> |
| Open Partial Nephrectomy         | 1535 (40.3)                     | 1289 (38.9)                     | 246 (49.6)                     |                  |
| Open Radical Nephrectomy         | 1592 (41.8)                     | 1426 (43.1)                     | 166 (33.5)                     |                  |
| Laparoscopic Partial Nephrectomy | 193 (5.1)                       | 170 (5.1)                       | 23 (4.6)                       |                  |
| Laparoscopic Radical Nephrectomy | 137 (3.6)                       | 118 (3.6)                       | 19 (3.8)                       |                  |
| Robotic Partial Nephrectomy      | 288 (7.6)                       | 247 (7.5)                       | 41 (8.3)                       |                  |
| Robotic Radical Nephrectomy      | 63 (1.7)                        | 62 (1.9)                        | 1 (0.2)                        |                  |

**Supplementary Table 2.** Surgery type by the year. Things to note robotic surgery did not begin until 2005-2009 and became more common in 2010-2014. Lap surgery did not begin until 2005-2009 and became more common from 2005-2009. These patterns indicate that the patients before 2000 were treated differently due to new technology being developed after 2000.

|                   | <b>Total</b><br><b>(n=3808)</b> | <b>ccRCC</b><br><b>(n=3312)</b> | <b>chRCC</b><br><b>(n=496)</b> | <b>p-value</b> |
|-------------------|---------------------------------|---------------------------------|--------------------------------|----------------|
| Surgery years (%) |                                 |                                 |                                | 0.06           |
| 1990-1994         | 258 (6.8)                       | 239 (7.2)                       | 19 (3.8)                       |                |
| 1995-1999         | 418 (11)                        | 370 (11.2)                      | 48 (9.7)                       |                |
| 2000-2004         | 700 (18.4)                      | 597 (18)                        | 103 (20.8)                     |                |
| 2005-2009         | 985 (25.9)                      | 853 (25.8)                      | 132 (26.6)                     |                |
| 2010-2014         | 1182 (31)                       | 1027 (31)                       | 155 (31.3)                     |                |
| 2015-2016         | 265 (7)                         | 226 (6.8)                       | 39 (7.9)                       |                |

**Supplementary Table 3.** Univariate analysis in chRCC. Size, sarcomatoid, and T-Stage are significant in OS and metastatic RFS. Age is also significant in OS. Necrosis is significant in metastatic RFS

| Parameter                       | Recurrence Free Survival |              |          |          |                  | Overall Survival |              |          |          |                  |
|---------------------------------|--------------------------|--------------|----------|----------|------------------|------------------|--------------|----------|----------|------------------|
|                                 |                          | Hazard Ratio | CI Lower | CI Upper | P-val            |                  | Hazard Ratio | CI Lower | CI Upper | P-val            |
| BMI                             |                          | 1.033        | 0.958    | 1.115    | 0.3985           |                  | 1.017        | 0.958    | 1.080    | 0.5718           |
| Gender (Male vs Female)         |                          | 1.069        | 0.485    | 2.355    | 0.8679           |                  | 1.085        | 0.667    | 1.767    | 0.7417           |
| Multifocality (Yes vs No)       |                          | 0.750        | 0.101    | 5.552    | 0.7779           |                  | 1.224        | 0.444    | 3.372    | 0.6959           |
| Necrosis (Yes vs No)            |                          | 3.233        | 1.105    | 9.460    | <b>0.0322</b>    |                  | 2.062        | 0.818    | 5.195    | 0.1249           |
| Race (... vs White)             | Asian                    | 1.051        | 0.142    | 7.796    | 0.9611           | Asian            | 0.519        | 0.072    | 3.752    | 0.5156           |
|                                 | Black                    | 0.513        | 0.069    | 3.802    | 0.5138           | Black            | 1.801        | 0.819    | 3.961    | 0.1432           |
|                                 | Other                    | 0.000        | 0.000    | .        | 0.9897           | Other            | 0.000        | 0.000    | .        | 0.9871           |
| Size                            |                          | 1.236        | 1.157    | 1.321    | <b>&lt;.0001</b> |                  | 1.090        | 1.039    | 1.143    | <b>0.0004</b>    |
| Age                             |                          | 0.985        | 0.955    | 1.015    | 0.3203           |                  | 1.067        | 1.042    | 1.093    | <b>&lt;.0001</b> |
| Sarcomatoid (Yes vs No)         |                          | 40.747       | 13.363   | 124.245  | <b>&lt;.0001</b> |                  | 38.686       | 14.721   | 101.662  | <b>&lt;.0001</b> |
| Surgery Year (... vs 1990-1995) | 1995-1999                | 0.384        | 0.078    | 1.904    | 0.2415           | 1995-1999        | 2.050        | 0.688    | 6.106    | 0.1972           |
|                                 | 2000-2004                | 0.484        | 0.128    | 1.824    | 0.2835           | 2000-2004        | 2.324        | 0.785    | 6.884    | 0.1278           |
|                                 | 2005-2009                | 0.627        | 0.173    | 2.274    | 0.4775           | 2005-2009        | 1.703        | 0.524    | 5.534    | 0.3756           |
|                                 | 2010-2014                | 0.000        | 0.000    | .        | 0.9858           | 2010-2014        | 0.558        | 0.095    | 3.285    | 0.5190           |
|                                 | 2015-2016                | 0.000        | 0.000    | .        | 0.9955           | 2015-2016        | 0.000        | 0.000    | .        | 0.9862           |
| T-Stage (T3 or T4 vs T1 or T2)  |                          | 5.035        | 2.283    | 11.105   | <b>&lt;.0001</b> |                  | 2.660        | 1.618    | 4.372    | <b>.0001</b>     |

**Supplementary Table 4.** Univariate analysis in ccRCC. BMI, Gender, Fuhrman Grade, Size, Age, Sarcomatoid, Surgery year, and T-Stage were all significant in both OS and met RFS survival in ccRCC patients. Race was statistically different between White and Asian for OS but not metastatic RFS

| Parameter                       | Recurrence Free Survival |              |          |          |                  | Overall Survival |              |          |          |                  |
|---------------------------------|--------------------------|--------------|----------|----------|------------------|------------------|--------------|----------|----------|------------------|
|                                 |                          | Hazard Ratio | CI Lower | CI Upper | P-val            |                  | Hazard Ratio | CI Lower | CI Upper | P-val            |
| BMI                             |                          | 0.978        | 0.967    | 0.989    | <b>0.0002</b>    |                  | 0.989        | 0.979    | 0.998    | <b>0.0197</b>    |
| Gender (Male vs Female)         |                          | 1.464        | 1.202    | 1.783    | <b>0.0001</b>    |                  | 1.195        | 1.038    | 1.376    | <b>0.0133</b>    |
| Multifocality (Yes vs No)       |                          | 1.014        | 0.711    | 1.445    | 0.9402           |                  | 1.110        | 0.850    | 1.450    | 0.4419           |
| Fuhrman Grade                   |                          | 3.038        | 2.674    | 3.452    | <b>&lt;.0001</b> |                  | 2.112        | 1.915    | 2.329    | <b>&lt;.0001</b> |
| Race (... vs White)             | <b>Asian</b>             | 0.961        | 0.607    | 1.520    | 0.8644           | Asian            | 0.635        | 0.407    | 0.989    | <b>0.0446</b>    |
|                                 | Black                    | 0.756        | 0.436    | 1.313    | 0.3209           | Black            | 0.762        | 0.515    | 1.127    | 0.1729           |
|                                 | Other                    | 0.820        | 0.307    | 2.195    | 0.6934           | Other            | 1.224        | 0.656    | 2.283    | 0.5256           |
| Size                            |                          | 1.212        | 1.195    | 1.229    | <b>&lt;.0001</b> |                  | 1.151        | 1.133    | 1.169    | <b>&lt;.0001</b> |
| Age                             |                          | 1.012        | 1.005    | 1.020    | <b>0.0015</b>    |                  | 1.047        | 1.041    | 1.054    | <b>&lt;.0001</b> |
| Sarcomatoid (Yes vs No)         |                          | 6.637        | 5.091    | 8.654    | <b>&lt;.0001</b> |                  | 5.298        | 4.198    | 6.685    | <b>&lt;.0001</b> |
| Surgery Year (... vs 1990-1995) | 1995-1999                | 0.674        | 0.486    | 0.934    | <b>0.0177</b>    | 1995-1999        | 0.802        | 0.651    | 0.988    | <b>0.0386</b>    |
|                                 | 2000-2004                | 0.765        | 0.570    | 1.025    | 0.0729           | 2000-2004        | 0.817        | 0.664    | 1.004    | <b>0.0542</b>    |
|                                 | 2005-2009                | 0.640        | 0.478    | 0.855    | <b>0.0026</b>    | 2005-2009        | 0.640        | 0.510    | 0.803    | <b>0.0001</b>    |
|                                 | 2010-2014                | 0.437        | 0.317    | 0.602    | <b>&lt;.0001</b> | 2010-2014        | 0.613        | 0.463    | 0.811    | <b>0.0006</b>    |
|                                 | 2015-2016                | 0.106        | 0.026    | 0.434    | <b>0.0018</b>    | 2015-2016        | 0.628        | 0.196    | 2.016    | 0.4345           |
| T-Stage (T3 or T4 vs T1 or T2)  |                          | 6.583        | 5.210    | 8.318    | <b>&lt;.0001</b> |                  | 3.428        | 2.855    | 4.116    | <b>&lt;.0001</b> |
